11 **Abstract (150 words; limit 150)**

12 Animal circadian rhythms persist in constant darkness and are driven by intracellular  
13 transcription-translation feedback loops. Although these cellular oscillators communicate,  
14 isolated mammalian cellular clocks continue to tick away in darkness without intercellular  
15 communication. To investigate these issues in *Drosophila*, we assayed behavior as well as  
16 molecular rhythms within individual brain clock neurons while blocking communication within  
17 the ca. 150 neuron clock network. We also generated CRISPR-mediated neuron-specific  
18 circadian clock knockouts. The results point to two key clock neuron groups: loss of the clock  
19 within both regions but neither one alone has a strong behavioral phenotype in darkness;  
20 communication between these regions also contributes to circadian period determination. Under  
21 these dark conditions, the clock within one region persists without network communication. The  
22 clock within the famous PDF-expressing s-LN<sub>v</sub> neurons however was strongly dependent on  
23 network communication, likely because clock gene expression within these vulnerable sLN<sub>v</sub>s  
24 depends on neuronal firing or light.

25

26 **Introduction:**

27 Neuronal networks make myriad contributions to behavior and physiology. By definition,  
28 individual neurons within a network interact, and different networks also interact to coordinate  
29 specialized functions. For example, the visual cortex and motor output centers must coordinate to  
30 react properly to environmental changes. In a less immediate fashion, sleep centers and circadian  
31 clocks are intertwined to properly orchestrate animal physiology. The circadian system is of  
32 special interest: it not only times and coordinates physiology within neuronal tissues but also

33 sends signals to the body to keep the entire organism in sync with the cycling external  
34 environment (Mohawk et al., 2012).

35 The small, circumscribed *Drosophila* clock network is ideal to address circadian  
36 communication issues. The comparable region in mammals, the suprachiasmatic nucleus, is  
37 composed of thousands of cells depending on the species. There are in contrast only 75 clock  
38 neurons per hemisphere in *Drosophila*. These different clock neurons can be divided into several  
39 subgroups according to their location within the fly brain. There are 4 lateral and 3 dorsal neuron  
40 clusters, which have different functions in controlling fly physiology (Helfrich-Förster et al.,  
41 2007).

42 The four small ventro-lateral neurons (sLNvs) are arguably the most important of the 75  
43 clock neurons. This is because ablating or silencing these neurons abolishes rhythms in constant  
44 darkness (DD). They reside in the accessory medulla region of the fly brain, an important  
45 pacemaker center in many insects (Helfrich-Förster, 1997), and express the neuropeptide PDF. In  
46 addition, they are essential for predicting dawn (Depetris-Chauvin et al., 2011; Grima et al.,  
47 2004; Nitabach et al., 2002; Stoleru et al., 2004). A very recent study suggests that the sLNvs are  
48 also able to modulate the timing of the evening (E) peak of behavior (Schlichting et al., 2019).

49 The other ventral-lateral group, the four large-ventro-lateral neurons (lLNvs), also express PDF  
50 and send projections to the medulla, the visual center of the fly brain; they are important arousal  
51 neurons (Shang et al., 2008; Sheeba et al., 2008). Consistent with the ablation experiments  
52 mentioned above, the absence of *pdf* function or reducing PDF levels via RNAi causes  
53 substantial arrhythmic behavior in DD (Renn et al., 1999; Shafer and Taghert, 2009).

54 Other important clock neurons include the dorso-lateral neurons (LNds), which are essential  
55 for the timing of the E peak and adjustment to long photoperiods (Grima et al., 2004;

56 Kistenpennig et al., 2018; Stoleru et al., 2004). Two other clock neuron groups, the lateral-  
57 posterior neurons (LPN) and a subset of the dorsal neurons (DN1s), were recently shown to  
58 connect the clock network to sleep centers in the fly central complex (Guo et al., 2018, 2016;  
59 Lamaze et al., 2018; Ni et al., 2019). The DN2 neurons are essential for temperature preference  
60 rhythms (Hamada et al., 2008), whereas no function has so far been assigned to the DN3s.

61 Despite these distinct functions, individual clock neuron groups are well-connected to each  
62 other. At the anatomical level, all lateral neuron clusters and even DN1 dorsal neurons send  
63 some of their projections into the accessory medulla, where they can interact. A second area of  
64 common interaction is the dorsal brain; only the ILNvs do not project there (Helfrich-Förster et  
65 al., 2007).

66 Several studies have investigated interactions between different clock neurons. Artificially  
67 expressing kinases within specific clock neurons causes their clocks to run fast or slow and also  
68 changes the overall free-running period of the fly, indicating that network signaling adjusts  
69 behavior (Yao and Shafer, 2014). Similarly, speeding up or slowing down individual neurons is  
70 able to differentially affect behavioral timing in standard light-dark (LD) cycles (Stoleru et al.,  
71 2005; Yao et al., 2016). A high level of neuronal plasticity within the network also exists: axons  
72 of individual cells undergo daily oscillations in their morphology (Fernández et al., 2008), and  
73 neurons change their targets depending on the environmental condition (Gorostiza et al. 2014;  
74 Chatterjee et al. 2018).

75 How neuronal communication influences the fly core feedback loop is not well understood.  
76 The latter consists of several interlocked transcriptional-translational feedback loops, which  
77 probably underlie rhythms in behavior and physiology (Hardin, 2011). A simplified version of  
78 the core feedback loop consists of the transcriptional activators Clock (CLK) and Cycle (CYC)

79 and the transcriptional repressors Period (PER) and Timeless (TIM). CLK and CYC bind to E-  
80 boxes within the *period* (*per*) and *timeless* (*tim*) genes (among other clock-controlled genes) and  
81 activate their transcription. After PER and TIM synthesis in the cytoplasm, they form a  
82 heterodimer and enter the nucleus towards the end of the night. There they interact with CLK  
83 and CYC, release them from their E-box targets and thereby inhibit their own transcription. All  
84 75 pairs of clock neurons contain this canonical circadian machinery, which undergoes daily  
85 oscillations in level. Indeed, the immunohistochemical cycling of PER and TIM within these  
86 neurons is a classic assay to visualize these molecular oscillations (Menegazzi et al., 2013).

87 Silencing PDF neurons stops their PER cycling, indicating an important role of neuronal firing  
88 in maintaining circadian oscillations. However, only two time points were measured, and the  
89 results were possibly confounded by developmental effects (Depetris-Chauvin et al., 2011;  
90 Nitabach et al., 2002). PDF neuron silencing also phase advances PER cycling in downstream  
91 neurons, suggesting that PDF normally serves to delay cycling in target neurons (Wu et al.,  
92 2008). This is consistent with experiments showing that PDF signaling stabilizes PER (Li et al.,  
93 2014). In addition, neuronal activation is able to mimic a light pulse and phase shift the clock  
94 due to firing-mediated TIM degradation (Guo et al., 2014).

95 To investigate more general features of clock neuron interactions on the circadian machinery,  
96 we silenced the majority of the fly brain clock neurons and investigated behavior and clock  
97 protein cycling within the circadian network in a standard light-dark cycle (LD) as well as in  
98 constant darkness (DD). Silencing abolished rhythmic behavior but had no effect on clock  
99 protein cycling in LD, indicating that the silencing affects circadian output but not oscillator  
100 function in a cycling light environment. Silencing similarly abolished rhythmic behavior in DD  
101 but with very different effects on clock protein cycling. Although protein cycling in the LNds

102 was not affected by neuronal silencing in DD, the sLN<sub>v</sub>s dampened almost immediately.  
103 Interestingly, this differential effect is under transcriptional control, suggesting that some  
104 *Drosophila* clock neurons experience activity-regulated clock gene transcription. Cell-specific  
105 CRISPR/Cas9 knockouts of the core clock protein PER further suggests that network properties  
106 are critical to maintain wild-type activity-rest rhythms. Our data taken together show that clock  
107 neuron communication and firing-mediated clock gene transcription are essential for high  
108 amplitude and synchronized molecular rhythms as well as rhythmic physiology.

109

## 110 **Results:**

111 To investigate the effects of clock network communication on fly behavior, we silenced most  
112 adult brain clock neurons using UAS-*Kir* (Johns et al., 1999). To this end, we used the *clk856*-  
113 GAL4 driver, which is expressed in most clock neurons (Gummadova et al., 2009) and first  
114 addressed locomotor activity behavior in a 12:12 LD cycle.

115 Both control strains show the expected morning and evening (M and E) anticipation  
116 increases, which are normal behavioral manifestations of clock function (Fig. 1A and 1C). There  
117 is however no discernable activity anticipation in the silenced flies. Only brief activity increases  
118 are visible, precisely at the day/night and night/day transitions (Fig. 1B); these are startle  
119 responses (Rieger et al., 2003). Flies lacking PER show similar behavior (*per*<sup>01</sup> Fig. 1D).

120 To address possible developmental defects, we added *tub-GAL80ts* as an additional  
121 transgene to silence the clock network in an adult-specific manner. In this system, GAL80 is  
122 active at low temperatures (18°C) and inhibits GAL4 expression. By increasing the temperature  
123 to 30°C, GAL80 is inactivated, GAL4 is then functional and the *clk856* network silenced  
124 (McGuire et al., 2003).

125           At the low temperature, the controls and experimental lines show a typical wild-type  
126 bimodal activity pattern, which disappeared in experimental flies after switching to the high  
127 temperature (Suppl. Fig. 1). This shows that the *clk856>Kir* phenotype is not caused by defects  
128 during development.

129           We next compared the behavior to flies with silenced PDF neurons. Adult-specific  
130 silencing of the PDF neurons using the gene-switch system reduced M anticipation and  
131 significantly advanced the timing of the E peak (Fig. 1E and 1F), which reproduces previously  
132 published results (Depetris-Chauvin et al., 2011; Nitabach et al., 2002). However, the  
133 comparison with the *clk856* results shown above indicates that silencing the whole clock neuron  
134 network causes a much more severe behavioral phenotype than only silencing the PDF cells, i.e.,  
135 network silencing completely abolishes rhythmic LD behavior, similar to clock mutant flies.

136           How does network silencing affect the circadian molecular feedback loop? To address  
137 this issue, we assayed PER as well as PDP1 protein levels in individual clock neuron clusters at  
138 four different times during the LD cycle. Both proteins show robust cycling: PER peaks at the  
139 end of the night (ZT0), and PDP1 peaks slightly earlier than PER as expected (Hardin, 2011)  
140 (Fig. 1G-1L). This indicates that network silencing has no detectable effect on clock protein  
141 timing or cycling amplitude in LD. These data further suggest that either the different neuron  
142 clocks are self-sustained, comparable to the mammalian liver, or that light can drive rhythmic  
143 gene expression even in absence of neuronal communication.

144           To distinguish between these possibilities, we assayed behavior and molecular cycling in  
145 constant darkness (DD). Only 17% of the silenced flies were rhythmic, indicating that network  
146 silencing causes high levels of DD arrhythmicity (Fig. 2A). To rule out developmental effects,  
147 we applied the *tub-GAL80ts* system as described above: 80 percent of the experimental flies were

148 rhythmic at 18°C, but they were profoundly arrhythmic at 30°C with only two rhythmic flies  
149 (Suppl. Fig. 2). In contrast, adult-specific silencing of only the PDF neurons more weakly  
150 reduced rhythmicity (Fig. 2A) and also caused a short period (Fig. 2B), phenotypes that are  
151 essentially indistinguishable from those of the classical *pdf<sup>01</sup>* mutant (Renn et al., 1999).

152 To address why network silencing has such a profound effect, we assayed PER and PDP1  
153 protein cycling after five days in constant darkness (DD5). As expected, all assayed clock  
154 neurons from control strains maintain robust and coordinated cycling in DD (Fig. 2C-H); the  
155 sLNvs, LNds and DN1s peak slightly sooner than in LD, consistent with the slightly less than 24  
156 hr circadian period in DD (Fig. 2B).

157 In striking contrast, silencing the clock network causes clock protein cycling within the  
158 individual neuronal subgroups to differ strongly from each other, in amplitude and in phase.  
159 Clock protein cycling in the LNds is least affected by neuronal silencing and with little to no  
160 change in phase or amplitude, suggesting a robust and possibly self-autonomous clock in these  
161 neurons; see Discussion (Fig. 2D and 2G). The sLNvs in contrast dampen and rapidly become  
162 arrhythmic, suggesting that these cells are rather weak oscillators and require network activity or  
163 light for proper molecular rhythms (Fig. 2C and 2F). The DN1s also dampen but less strongly.  
164 They manifest low amplitude cycling, which is phase-advanced; this intermediate situation  
165 suggests a fast and somewhat network dependent clock in DN1s (Fig. 2E and 2H). The DN2s  
166 were similar to the DN1s (data not shown). A comparable set of effects were observed in adult-  
167 specific silencing experiments (Suppl. Fig. 3).

168 To further address the molecular basis of the silencing dependence, we applied a  
169 fluorescent in-situ hybridization (fish) protocol to whole-mount *Drosophila* brains. Because *per*  
170 mRNA was undetectable, likely due to low expression within the clock network (data not shown



171 and (Abruzzi et al., 2017)), we assayed *tim* mRNA cycling in LNds and in sLNvs as a proxy for  
172 clock gene transcription/mRNA levels. In control flies under LD conditions, *tim*-RNA cycles  
173 robustly in both sLNvs and LNds with a peak towards the beginning of the night as expected. In  
174 addition, clock network silencing had no effect on *tim* mRNA cycling amplitude or phase in LD,  
175 which parallels the protein cycling results (Fig. 3A and 3B). In constant darkness (DD5), the  
176 controls show robust cycling in both sLNvs and LNds as expected, but silencing causes a  
177 profound decrease in *tim* mRNA signal in the sLNvs; the LNds cycle normally (Fig. 3C and 3D).  
178 These data indicate a direct correlation between neuronal activity and *tim* RNA levels at least in  
179 the sLNvs and suggest that the silencing-mediated changes in clock protein cycling are in part  
180 transcriptional in origin.

181 Network silencing therefore reveals different levels of autonomy and endogenous speeds  
182 among clock neuron clusters. This leads to a drifting apart of the different subgroups from their  
183 usual well-synchronized and robust clock protein expression pattern. Interestingly, it appears that  
184 these phase differences are too big to re-establish coordinated rhythms after one week of  
185 silencing; there is no indication of rhythmic behavior upon lowering the temperature in the  
186 *tubGAL80ts* experiment (Suppl. Fig. 4).

187 The results to this point indicate that neuronal activity/communication is essential for  
188 rhythmicity as well as synchronized, high amplitude clock protein cycling in DD conditions.  
189 However, these results do not provide a hierarchy among the different groups, nor do they  
190 address a need for the circadian clock within these neurons. To distinguish between these  
191 possibilities and to develop a general knock-out strategy within the adult fly brain, we  
192 established a cell-specific CRISPR/Cas9 strategy to eliminate the circadian clock in individual  
193 clock neuron groups (Fig. 4A). We applied the guide protocol introduced by Port and Bullock

194 (2016) and cloned three guides targeting the coding sequence of *per* under UAS control and  
195 generated UAS-*per-g* flies. For a first experiment, we expressed the *per*-guides and *Cas9* in most  
196 of the clock neuron network under *clk856* control and performed behavioral (Fig. 4B-4D) and  
197 immunocytochemical (Fig. 4E-4G) assays.

198 This PERKO strategy abolished M and E anticipation in LD behavior without affecting  
199 the startle responses (Fig. 4C), and it also reduced the level of DD rhythmicity to below 10%;  
200 this reproduced network silencing as well as the canonical *per<sup>01</sup>* behavioral phenotypes (Fig. 1D  
201 and 2A). Not surprisingly perhaps given these robust phenotypes, immunohistochemistry  
202 indicates that the PERKO strategy works at more than 90% efficiency. For example, there was  
203 no detectable nuclear PER signal in all PDF cells or in the DN2s (Fig. 4E and 4G). There is also  
204 a marked reduction in the number of PER-positive DN1s in the dorsal brain; this is expected as  
205 the *clk856*-GAL4 line does not express in all DN1 neurons (Gummadova et al., 2009) (Fig. 4G).  
206 Similarly, most LNds are PER-negative. There are however two LNds that remain PER-positive  
207 for some reason (Fig. 4F), i.e., there are a few cell escapers. We note that the PERKO strategy is  
208 also effective with weaker and more narrowly expressed GAL4 lines (Suppl. Fig. 5), indicating  
209 that it can be used to investigate the contribution of clocks in individual neuron subgroups to  
210 circadian behavior.

211 We next addressed the contribution of clocks within individual neuron subgroups to DD  
212 rhythmicity. Previous work assigned a central role to PDF neurons and specifically to the small  
213 LNvs: ablating these cells eliminates DD rhythms, and expressing *per* in these same neurons  
214 restores DD rhythms to *per<sup>01</sup>* flies (Grima et al., 2004; Stoleru et al., 2004). We were therefore  
215 surprised that the PERKO with *pdf*-GAL4 had no discernable effect on DD rhythmicity  
216 compared to the controls (Fig. 4I). Similarly, a PERKO in the cells important for controlling E

217 activity (E cells: 3 LNDs and the 5th sLNv) with *MB122B*-split-GAL4 had no effect on  
218 rhythmicity (Fig. 4J). However, a PERKO in both groups achieved with *Mai179*-GAL4, lowered  
219 rhythmicity to less than 20% (Fig. 4K). Similar results were obtained with *dvPDF*-GAL4, which  
220 expresses in similar neuron groups (data not shown).

221 To address whether other neurons have similar effects, we expressed the PER guides  
222 elsewhere: knockout in the retina (*GMR*-GAL4), glial cells (*repo*-GAL4) or DN1s (*clk4.1M*-  
223 GAL4 and *AstC*-GAL4) did not affect rhythmicity (Suppl. Fig. 6). These findings taken together  
224 suggest that a clock in either of two key places, the sLNvs or the LNDs, can drive rhythmic  
225 behavior.

226 We also assayed the free-running DD periods of flies lacking PER in individual neuron  
227 subgroups (Fig. 5A). These periods did not change if the PERKO was in the dorsal brain and/or  
228 in the large PDF neurons, the ILNvs. However, a PERKO in the E cells and with drivers  
229 expressing in these cells plus some dorsal neurons results in a slight but significant period  
230 lengthening of approximately 0.5hr. In contrast, a PERKO in most of the lateral neuron clusters  
231 gave rise to a short period. These two sets of period phenotypes taken together suggest that the  
232 clocks in the two different key neuron subgroups collaborate to achieve the intermediate and  
233 close to 24h period characteristic of wild-type flies.

234

## 235 **Discussion**

236 The central clock of animals is essential for dictating the myriad diurnal changes in physiology  
237 and behavior. Knocking out core clock components such as *period* or *Clock* severely disrupts  
238 circadian behavior as well as molecular clock properties in flies and mammals (Allada et al.,  
239 1998; Gekakis, 1998; Konopka and Benzer, 1971). Here we show that similar behavioral effects

240 occur when we silence the central clock neurons and thereby abolish communication within this  
241 network and with downstream targets, i.e., fly behavior becomes arrhythmic in LD as well as DD  
242 conditions and resembles the phenotypes of core clock mutant strains (Konopka and Benzer,  
243 1971).

244         Despite the loss of all rhythmic behavior, silencing did not impact the molecular  
245 machinery in LD conditions: PER and PDP1 protein cycling was normal. These findings suggest  
246 that 1) rhythmic behavior requires clock neuron output, which is uncoupled from the circadian  
247 molecular machinery by network silencing, and 2) synchronized molecular rhythms of clock  
248 neurons do not require neuronal activity. These findings are in agreement with previous work  
249 showing that silencing the PDF neurons had no effect on PER cycling within these neurons  
250 (Depetris-Chauvin et al., 2011; Nitabach et al., 2002; Wu et al., 2008). The results presumably  
251 reflect the strong effect of the external light-dark cycle on these oscillators.

252         In DD however, the individual neurons change dramatically: the different neurons  
253 desynchronize, and their protein cycling damps to different extents. Interestingly, sLN<sub>v</sub> cycling  
254 relies most strongly on neuronal communication: these neurons cycle robustly in controls but  
255 apparently not at all in the silenced state. sLN<sub>v</sub>s were previously shown to be essential for DD  
256 rhythms (Grima et al., 2004; Stoleru et al., 2004). Unfortunately, the sensitivity of  
257 immunohistochemistry precludes determining whether the molecular clock has actually stopped  
258 or whether silencing has only (dramatically) reduced cycling amplitude. However, a simple  
259 interpretation of the adult-specific silencing experiment favors a stopped clock: decreasing the  
260 temperature to 18 degrees after a week at high temperature failed to rescue rhythmic behavior. A  
261 similar experiment in mammals gave rise to the opposite result, suggesting an effect of firing on  
262 circadian amplitude in that case (Yamaguchi et al., 2003). However, we cannot at this point

263 exclude a different explanation, for example a too large phase difference between the different  
264 neuronal subgroups to reverse after a week without communication.

265         In either case, a stopped clock or an effect on clock protein oscillation amplitude, these  
266 results make another link to the mammalian literature: modeling of the clock network suggests  
267 that different neurons resynchronize more easily if the most highly-connected cells are  
268 intrinsically weak oscillators (Webb et al., 2012). The sLNvs are essential for DD rhythms,  
269 known to communicate with other clock neurons (Grima et al., 2004; Stoleru et al., 2004) and are  
270 situated in the accessory medulla; this is an area of extensive neuronal interactions in many  
271 insects (Reischig and Stengl, 2003). These considerations rationalize weak sLNv oscillators.

272         An important role of interneuron communication in DD is in agreement with previous  
273 work showing that altering the speed of individual neuron groups can change the phase of  
274 downstream target neurons (Yao and Shafer, 2014). An important signaling molecule is the  
275 neuropeptide PDF: its absence changes the phase of downstream target neurons, and silencing  
276 PDF neurons causes an essentially identical phenotype to the lack of PDF (Im et al., 2011; Lin et  
277 al., 2004; Wu et al., 2008). However, the effects reported here are much stronger and show  
278 different levels of autonomy than PDF ablation, suggesting that other signaling molecules and/or  
279 the neuronal activity of additional clock neurons are essential to maintain proper rhythmic clock  
280 protein expression.

281         To address these possibilities, we took two approaches. First, we investigated clock gene  
282 RNA levels after silencing. The goal was to assess whether the damping of silenced neurons is  
283 under gene expression control, likely transcriptional control. Indeed, *tim* mRNA profiles nicely  
284 reproduced the protein cycling profiles: robust cycling of all (assayed) clock neurons was  
285 maintained in LD even with silencing, but *tim*-mRNA levels in the sLNvs stopped cycling in

286 DD; in contrast, robust cycling was maintained in the LNds (Fig 2D and 2G). This suggests that  
287 the changes in protein cycling amplitude and also possibly phase are under transcriptional  
288 control. Importantly, the *tim* signal in the sLNvs disappeared upon silencing, suggesting that  
289 neuronal activity promotes clock gene transcription at least in this subset of neurons. This  
290 recapitulates for the first time in *Drosophila* the robust positive relationship between neuronal  
291 firing and clock gene transcription in mammals (Shigeyoshi et al., 1997). To date, *Drosophila*  
292 neuronal firing had only been connected to post-transcriptional clock protein regulation, namely  
293 TIM degradation (Guo et al., 2014). Conceivably, these two effects are connected: TIM  
294 degradation might be required to relieve transcriptional repression and maintain cycling.

295 The second approach was a cell-specific knockout strategy, applied to the clock neuron  
296 network. We generated three guides targeting the CDS of *per* and also expressed CAS9 in a cell-  
297 specific manner. The guides caused double strand breaks in the *per* gene, which in turn led to  
298 cell-specific *per* mutations. This adult brain knockout strategy worked reliably and specifically,  
299 in glial cells as well as neurons, with a greater than 90% efficiency and with no apparent  
300 background effects (Fig. 4B-G). We have successfully used this strategy to knock out most if not  
301 all *Drosophila* GPCRs (data not shown) and believe it will be superior to RNAi for most  
302 purposes. Importantly, expression of the guides with the *clk856*-GAL4 driver phenocopied *per*<sup>01</sup>  
303 behavior (Fig. 4C and 4H). To focus on individual clock neurons, we generated cell-specific  
304 knockouts in different clock neurons. To our surprise, a PERKO in the PDF cells did not increase  
305 the level of arrhythmicity. Only a PERKO in most lateral neurons, E cells as well as PDF cells,  
306 generated high levels of arrhythmic behavior. As PDF cell ablation also causes high levels of  
307 arrhythmicity (Stoleru et al., 2004), the data shown here suggest that the LNds can drive the  
308 rhythmic output of key sLNv genes even in the absence of a clock in these neurons. Consistent

309 with this interpretation, recent data indicate that the LNds project dendritic as well as axonal  
310 arborizations into the accessory medulla, the location of the sLNvs, indicating extensive  
311 communication between these two important subgroups of clock neurons (Schlichting et al.,  
312 n.d.). This interpretation is further supported by examining the free-running period of the cell-  
313 specific knockouts: Ablating *per* in the LNds causes a long period, whereas ablating PER in most  
314 lateral clock neurons causes a short period phenotype. These data suggest that interactions  
315 between the sLNvs and other clock cells, perhaps within the accessory medulla, are essential for  
316 the close to 24h speed of the overall brain and behavioral clock.

317         While this manuscript was being written, we became aware of two other studies  
318 addressing the contribution of different circadian subgroups and neuronal interactions to  
319 *Drosophila* rhythms. The strategy, results and conclusions in the first study overlap extensively  
320 to what we report here (Delventhal et al., cosubmitted paper). That work exploited guides against  
321 *tim* as well as against *per* and thoroughly characterized the efficacy of the cell-specific knockout  
322 strategy, including effects on mRNA cycling.

323         The second study is recently published and similarly highlights the dependence of DD  
324 rhythms on network properties (Bulthuis et al., 2019). However, they report a decrease in  
325 rhythmicity upon knockout of the circadian clock in PDF cells, an effect that neither we nor  
326 Delventhal observed. This difference may be due to their knockout strategy, namely,  
327 overexpression of a dominant negative Cycle isoform within PDF cells. This protein may have  
328 effects on gene expression beyond knocking out the circadian clock. This further suggests that  
329 the conceptually simpler PERKO strategy has fewer side effects and is therefore superior.

330         Some of the communication properties described here resemble what has been found in  
331 mammalian systems. For example, decreasing neuronal interactions by creating sparse SCN

332 cultures changes the free-running period and activity phase of individual neurons (Welsh et al.,  
333 1995). This suggests that communication is also critical for circadian phase and period  
334 determination in mammals. Nonetheless, fly clock cells may be even less cell-autonomous than  
335 what has been described for mammals (reviewed in (Evans, 2016)). First, the fly system may be  
336 particularly dependent on light. For example, peripheral fly clocks appear strongly light-  
337 dependent in contrast to what has been described for mammalian liver (reviewed in (Ito and  
338 Tomioka, 2016)). Although much of the fly data could reflect cellular asynchrony in constant  
339 darkness, circadian cycling in the periphery crashes rapidly under these conditions and resembles  
340 the strong and rapid non-cycling that occurs in the sLNvs upon silencing in DD. Notably, fly  
341 cryptochrome but not mammalian cryptochrome is light-sensitive (reviewed in (Michael et al.  
342 2017) and probably contributes to the light-dependence of fly peripheral clocks. This is also  
343 because light can directly penetrate the thin insect cuticle, which probably contributes to making  
344 the fly brain less dependent on ocular photoreception than the mammalian brain. However, some  
345 fly clock neurons do not express Cryptochrome, suggesting that the fly clock system is  
346 dependent on network interactions even in a light-dark cycle (Benito et al., 2008; Yoshii et al.,  
347 2008). These considerations suggest that the fly circadian network is an attractive object of study  
348 not only because of its limited size of 75 neuron pairs but also because of its strong dependence  
349 on neuronal communication.

350

## 351 **Material and Methods**

### 352 Fly strains and rearing:

353 The following fly lines were used: *clk856*-GAL4 (Gummadova et al., 2009), UAS-*Kir2.1* (BL:  
354 6595), *pdf-GS*-GAL4 (Depetris-Chauvin et al., 2011), *per<sup>01</sup>* (Konopka and Benzer, 1971),



355 *mai179*-GAL4 (Grima et al., 2004), *MB122B*-GAL4 (Guo et al., 2017), *pdfM*-GAL4 (Renn et al.,  
356 1999), *clk4.1M*-GAL4 (Zhang et al., 2010), UAS-*Cas9.P2* (BL 58986), *AstC*-GAL4 (BL:  
357 52017), *dvPDF*-GAL4 (Guo et al., 2014), *w;CyO/Sco;MKRS/TM6B* (BL: 3703), *VGlut*-GAL4  
358 (BL: 60312), *GMR-ss0650*-GAL4, *GMR-ss01038*-GAL4, *GMR-ss00849*-GAL4, *GMR-*  
359 *ss00367*-GAL4, *GMR-ss00681* (Liang et al., 2019), *GMR*-GAL4 (BL: 1104), *repo*-GAL4 (BL:  
360 7415), *tub*-GAL80ts (BL: 7018). The SS00849, SS00367, SS01038, SS00645, SS00650 lines  
361 were made and characterized by H. Dionne and A. Nern in the laboratory of G. Rubin (Janelia  
362 Research Campus). All flies were reared on standard cornmeal medium at a temperature of 25°C,  
363 with the exception of adult-specific silencing experiments for which flies were raised at 18°C.  
364

#### 365 Fly line generation:

366 We generated a UAS-*per-g* line following the protocol published by (Port and Bullock, 2016). In  
367 short, we digested the pCFD6 Vector (addgene #73915) with BbsI, PCR amplified two PCR  
368 fragments carrying three guides targeting the CDS of *per* and performed a Gibson Assembly to  
369 include those in the pCFD6 backbone. Positive clones were sent for injection to Rainbow  
370 Transgenic Flies Inc (Camarillo, CA, USA) and the transgene was inserted into the second  
371 chromosome by phi-recombinase using BL 8621. Flies were crossed to *w<sup>1118</sup>* for screening and  
372 positive individuals were balanced using BL 3703. The following guide sequences were used:

373 *per* guide1: GGCAGAGCCACAACGACCTC

374 *per* guide2: CAAGATCATGGAGCACCCGG

375 *per* guide3: GAGCAAGATCATGGAGCACC

376

377

378 Behavior recording and data analysis.

379 Individual 2-6 days old male flies were singularly transferred into glass tubes (diameter 0.5mm)  
380 with food (2% agar and 4% sucrose) on one end and a cotton plug to close the tube on the other  
381 end. The tubes were placed into *Drosophila* Activity Monitors (DAM, Trikinetics) in a way that  
382 the infrared light beam was located in the center of the tube. A computer measured the number of  
383 light-beam interruptions caused by the movement of the fly in one-minute intervals. We recorded  
384 the behavior of all flies at a constant temperature of 25°C for 5-7 days under standard light-dark  
385 conditions of 12h light and 12h darkness (LD12:12) followed by constant darkness (DD) for at  
386 least 6 days. For performing adult-specific silencing experiments, we raised the flies at 18  
387 degrees and performed 2 separate sets of experiments: In the LD experiment, we recorded the  
388 behavior of the flies for 3 days at 18°C and switched to 30°C to silence the neurons and follow  
389 the behavioral change within the same sets of flies. In a second set of experiments, we raised the  
390 two groups of flies at 18°C and then performed LD to DD experiments either at 18°C or 30°C. In  
391 the 30°C experiment, we decreased the temperature back to 18°C at Circadian Time (CT) 0 after  
392 6 days in DD to investigate possible emergence of rhythmic behavior after silencing. We  
393 continued recording the behavior for 6 more days in DD at 18°C.  
394 We generated actograms using ActogramJ (Schmid et al., 2011). We next generated average  
395 activity profiles of at least the last 3 days of LD condition as previously described (Schlichting  
396 and Helfrich-Förster, 2015). Each experiment consists of at least 2 biological repeats. DD  
397 analysis was performed using chi<sup>2</sup>-analysis. Statistical analysis was performed using a student's  
398 t-test or one-way ANOVA followed by post-hoc Tukey analysis.

399

400

401 Immunohistochemistry:

402 2-6 days old male flies were entrained in LD 12:12 at 25°C for three days and collected at ZT0 to  
403 analyze the CRISPR/Cas9 knockout strategy. To investigate clock protein cycling, 2-6 days old  
404 male flies were entrained in LD 12:12 at 25°C for 5 days and collected in 6h intervals around the  
405 clock. Similarly, flies were entrained for 5 days and released into DD for 5 more days to obtain  
406 cycling data at DD5.

407 The whole flies were fixed for 2h 45min in 4% paraformaldehyde (PFA) in phosphate-  
408 buffered saline (pH=7.4) including 0.5% TritonX (PBST). The flies were rinsed 5 times for 10  
409 min each with PBST and subsequently the brains were dissected in PBST. Brains were blocked  
410 in 5% normal goat serum (NGS) in PBST for 3h at room temperature (RT). The primary  
411 antibody (rabbit anti-PER, 1:1000, (Stanewsky et al., 1998), mouse anti-PDF, 1:500, *Drosophila*  
412 Studies Hybridoma Library (DSHB), C7 and guinea-pig anti PDP1, 1:2000, (Benito et al., 2007))  
413 was applied overnight at RT and the brains subsequently rinsed 5 x 10mins with PBST.  
414 Secondary antibodies (Alexa, Fisher Scientific, 1:200) were applied for 3h at RT. Afterwards,  
415 the brains were rinsed 5 x 10 mins with PBST and mounted on glass slides using Vectashield  
416 (Vector Laboratories INC., Burlingame, CA, USA) mounting medium.

417 Confocal microscopy was performed using a Leica SP5 microscope. Sections of 1.5 um  
418 thickness were obtained. Laser settings were kept constant across genotypes to obtain  
419 comparable results. Image acquisition was performed using Fiji. Staining intensity was assessed  
420 by quantifying the brightest 3x3 pixel area of individual neurons of at least 5 brains per  
421 timepoint. Each experiment consists of at least 2 biological repeats. Three different background  
422 intensities were determined the same way and subtracted from the neuronal intensity. Data points  
423 represent average and SEM.

424 Fluorescent in-situ hybridization (fish)

425 2-6 days old male flies were entrained for 5 days in LD 12:12 and collected in 6h intervals  
426 around the clock. In a second set of experiments, flies were released into DD for 5 days and  
427 collected in 6 h intervals. Flies were dissected fresh under red light to avoid phase-shifting the  
428 molecular machinery. Brains were subsequently fixed in 4% PFA in PBS for 55 min at RT.  
429 Afterwards, brains were washed 3 x 10min in PBST and dehydrated as described in(Long et al.,  
430 2017). Brains were kept in 100% EtOH until all time points were collected and all further steps  
431 were done simultaneously as described in (Long et al., 2017).

432 A set of 20-probe sequences were designed for the entire *pdf* mRNA sequence and  
433 conjugated with Quasar 570 (Stellaris Probes, Biosearch Technologies, CA, USA). The *tim*  
434 probes consist of a set of 48-probe sequences against the entire *tim* mRNA sequence, including  
435 the 5' and 3' untranslated regions. The *tim* probes were conjugated with Quasar 670 dye  
436 (Stellaris Probes, Biosearch Technologies, CA, USA). Probes were diluted to a stock  
437 concentration of 25  $\mu$ M and aliquoted in -20 °C. The final concentration of *pdf* probes and *tim*  
438 probes were 250 nM and 750 nM, respectively.

439 Brains were mounted on glass slides using Vectashield mounting medium (Vector  
440 Laboratories INC., Burlingame, CA, USA) and scanned using a Leica SP5 microscope in 1.5  $\mu$ m  
441 sections. All samples were scanned in one session to avoid signal loss. Fluorescence intensity  
442 was assessed by quantifying the brightest 3x3 pixel area of individual neurons of at least 5  
443 brains. Each experiment consists of at least 2 biological repeats. Three different background  
444 intensities were determined the same way and subtracted from the neuronal intensity. Data points  
445 represent average and SEM.

446

447 **Acknowledgements**

448 We would like to thank Dr. Fang Guo and Dr. Katharine Abruzzi for discussions and comments  
449 on the manuscript. Also, we are thankful to Dr. Norbert Perrimon and Dr. Paul Hardin for  
450 providing fly lines and antibodies. We thank H. Dionne, A. Nern and G. Rubin (Janelia Research  
451 Campus) for providing the unpublished split-GAL4 lines: SS00849, SS00367, SS01038,  
452 SS00645 and SS00650. Stocks obtained from the Bloomington *Drosophila* Stock Center (NIH  
453 P40OD018537) were used in this study. This work was supported by the Howard Hughes  
454 Medical Institute (HHMI). M.S. was sponsored by a DFG research fellowship (SCHL2135 1/1).

455

456 **Figure Legends**

457 Figure 1 Silencing the clock network has differential effects on behavior and clock protein  
458 cycling in LD. **A-C** Silencing most of the clock network abolishes rhythmic LD behavior. GAL4  
459 control (**A**) and UAS control (**C**) show bimodal activity patterns with M anticipation and E  
460 anticipation. Silenced flies (**B**) show no sign of anticipation neither in the morning nor in the  
461 evening. Flies show short activity increases at the transitions of day/night and night/day which  
462 are considered masking. **D** Behavior of *per<sup>01</sup>* flies in LD 12:12. *per<sup>01</sup>* mutants show behavior  
463 similar to *clk856>Kir* with no M and E anticipation but short reactions to the light transitions. **E-**  
464 **F** Silencing PDF neurons alters LD behavior. **E** *PDF-GS>Kir* on Vehicle food does not express  
465 *Kir*. Flies show the typical bimodal activity with M and E anticipation peaks. The M peak is  
466 close to lights-on (ZT0) whereas the E peak is close to lights-off (ZT12). **F** Silencing the PDF  
467 neurons by adding RU 486 to the food causes an advanced E peak, similar to *pdf<sup>01</sup>* flies. **G-I** PER  
468 protein cycling is largely unaffected by neuronal silencing in LD. PER cycling in control brains  
469 (black data points  $\pm$  SEM, pooled GAL4 and UAS) is highly synchronized with peak levels

470 around ZT0. Silencing the clock network (red data points  $\pm$  SEM) had little effect on LD PER  
471 rhythms in sLNvs (**G**) and LNds (**H**). DN1s appear dampened after silencing (**I**). **J-L** PDP1  
472 protein cycling is largely unaffected by neuronal silencing in LD. PDP1 cycling in control brains  
473 (black data points  $\pm$  SEM, pooled GAL4 and UAS) is highly synchronized with peak levels  
474 around ZT18. Silencing the clock network (red data points  $\pm$  SEM) had little effect on LD PDP1  
475 rhythms in sLNvs (**J**) and LNds (**K**) and DN1s (**L**).

476 Figure 2 Silencing the clock network strongly affects behavior and molecular rhythms in DD **A**  
477 Percentage of rhythmic flies in DD. Silencing most of the clock neurons significantly reduces  
478 rhythmicity to less than 20 percent, suggesting that clock neuron activity is essential for rhythmic  
479 behavior output. None of the *per*<sup>01</sup> flies were rhythmic as expected. Silencing the PDF neurons  
480 slightly decreased the level of rhythmicity. **B** Free-running period of rhythmic flies from A. The  
481 few rhythmic flies of *clk856>Kir* show a significantly longer period ( $F_{(2,48)}=14.355$   $p<0.001$ ,  
482  $p<0.01$  for UAS and GAL4 control). Adult-specific silencing of the PDF neurons caused a  
483 significant period shortening ( $p=0.0214$ ). **C-E** PER protein cycling in DD5. PER cycling in  
484 control brains (black data points  $\pm$  SEM, pooled GAL4 and UAS) is highly synchronized with  
485 peak levels around CT18. Silencing the clock network (red data points  $\pm$  SEM) had variable  
486 effects on PER rhythms: The sLNvs (**C**) dampen strongly upon silencing. The LNds (**D**) show  
487 only little differences between the groups and the DN1s strongly dampen, similar to sLNvs (**E**).

488 **F-H** PDP1 protein cycling in DD5. PER cycling in control brains (black data points  $\pm$  SEM,  
489 pooled GAL4 and UAS) is highly synchronized with peak levels around CT18. Silencing the  
490 clock network (red data points  $\pm$  SEM) had similar effects as observed in PER rhythms: The  
491 sLNvs (**F**) dampen strongly upon silencing. The LNds (**G**) show only little differences between  
492 the groups and the DN1s strongly dampen, but appear to have a phase-advanced PDP1 peak (**H**).

493  
494 **Figure 3** *tim* mRNA cycling in sLNvs and LNds shows similar trends as protein cycling observed  
495 by FISH. **A-B** *tim* mRNA cycling in LD 12:12 in sLNvs (**A**) and LNds (**B**). Control flies (black  
496 data points  $\pm$  SEM, pooled GAL4 and UAS) show high amplitude cycling with peak levels at the  
497 beginning of the night. Silencing the clock network (red data points  $\pm$  SEM) has only little effect  
498 on cycling amplitude or timing in LD. **C-D** *tim* mRNA cycling in DD5 in sLNvs (**C**) and LNds  
499 (**D**). Control flies (black data points  $\pm$  SEM, pooled GAL4 and UAS) show high amplitude  
500 cycling with peak levels at the beginning of the night. Silencing the sLNvs (**C**) leads to an  
501 overall reduction of *tim* mRNA levels and a loss of rhythmicity. In the LNds (**D**) silencing did  
502 not decrease cycling amplitude or shifted peak mRNA expression.

503  
504 **Figure 4** A clock in the LNds or the sLNvs can drive rhythmic behavior **A** Schematic model of  
505 cell-specific knockout (KO) strategy. We generated a UAS-*per-g* line using the pCFD6 vector,  
506 allowing us to express three guides under the control of one UAS promoter (after Port and  
507 Bullock 2016). We cloned three guides targeting the *per* CDS with guide 1 targeting the second  
508 exon shared by all transcripts and guides 2 and 3 targeting the 4th commonly shared exon. The  
509 guides will recruit the Cas9 protein and induce double-strand breaks and thereby cause mutations  
510 which lead to a non-functional protein. **B-D** Behavior of *per*KO using *clk856*-GAL4 in LD 12:12  
511 reproduces *per*<sup>01</sup> phenotype. Flies expressing *Cas9* in the majority of the clock neurons (**B**) and  
512 flies with both UAS-constructs (**D**) show bimodal activity with an M anticipation peak around  
513 lights-on and an E anticipation peak around lights-off. KO of *per* using *clk856*-GAL4 (**C**)  
514 abolishes M and E anticipation similar to *per*<sup>01</sup> flies. **E-G** Immunocytochemistry of Control  
515 (*clk856*>*Cas9*) and KO (*clk856*>*Cas9*, *perG*) staining against PER (magenta) and PDF (cyan).

516 Control flies show PER staining in both, sLNvs and ILNvs, whereas there is no detectable PER  
517 signal in the PDF cells in the KO strain (**E**). Similarly, we see six LNds in the control and two  
518 LNds in the experimental flies, showing that some neurons can escape (**F**) The number of PER+  
519 DN1s is strongly reduced in the KO strain and we do not detect PER in the DN2 neurons (**G**). **H-**  
520 **K** A clock in LNd or PDF neurons is necessary for rhythmic behavior. *Clk856*-GAL4 mediated  
521 KO reduces rhythmicity to less than 10% (**H**). KO in PDF neurons (*pdf*-GAL4) (**I**) or in the  
522 LNds (*MB122B*-split-GAL4) (**J**) had no effect on rhythmicity. KO in both places (*Mai179*-  
523 GAL4) significantly decreases rhythmicity (**K**).

524

525 Figure 5 KO of PER in subsets of neurons changes free-running period. **A** Changes of free-  
526 running period upon KO. Red bars represent the change of period between the KO line and the  
527 GAL4 control ( $\pm$  SEM), green bars represent the change of period between the KO line and the  
528 UAS control ( $\pm$  SEM). KO in most of the lateral neurons (*Mai179*-GAL4, *dvPDF*-GAL4) causes  
529 a shift towards short periods. KO in the dorsal brain (*clk4.1M*-GAL4, *AstC*-GAL4, *GMR*-  
530 *ss00657*-GAL4, *GMR-ss00650*-GAL4, *GMR-ss01038*-GAL4, *VGlut*-GAL4) does not affect the  
531 period, whereas KO in the LNds (*MB122B*-GAL4, *GMR-ss00849*-GAL4) lengthens the period.

532 **B** Model of neuronal communication and light influencing the Drosophila clock machinery.  
533 Silencing the clock network in DD causes a damping of molecular oscillations and a drifting  
534 apart from the common phase as indicated by the red waves. If network communication is  
535 allowed, the different neuronal sub-clusters are mostly in sync and show robust cycling,  
536 suggesting neuronal communication is essential for molecular oscillations. In a normal LD cycle  
537 light drives high amplitude and synchronized cycling even in the absence of neuronal  
538 communication, establishing a hierarchy of synchronization cues with light on the top.



539

540 Supplement Figure 1 Adult-specific silencing of most clock neurons causes arrhythmic LD  
541 behavior. Control (*clk856*-GAL4) and experimental (*clk856*-GAL4 UAS-*Kir tub*-GAL80*ts*) flies  
542 show bimodal activity at 18 degrees with an M and an E peak of activity. M anticipation is  
543 reduced in both cases due to the low temperature. At 30 degrees, control flies (upper panel) show  
544 a bimodal activity pattern with an M anticipation peak and an E anticipation peak. The E peak is  
545 delayed due to high temperatures. The experimental flies (lower panel) show no M or E peak at  
546 30 degrees.

547

548 Supplement Figure 2 Adult-specific silencing of most clock neurons causes arrhythmic DD  
549 behavior. **A** At 18 degrees we observe no decrease in rhythmicity in *clk856*>*tubKir* (dark red)  
550 compared to control (black) flies as expected. Increasing the temperature to 30 degrees (**B**)  
551 activates GAL4 and hence silences the neurons. *Clk856*>*tubKir* (red) flies get arrhythmic,  
552 whereas both controls (black) show high levels of rhythmicity. We observed no effect on free-  
553 running period at 18 degrees (**C**) but flies experimental flies showed the tendency towards a long  
554 period at 30 degrees (**D**), similar to *clk856*>*Kir* (Fig. 2B).

555

556 Supplement Figure 3 Adult-specific silencing reproduces PER cycling profiles. Flies were raised  
557 at 18 degrees and entrained at 30 degrees to allow network silencing. Flies were collected in 6h  
558 intervals in the fifth day of constant darkness. Control flies (*tub*-GAL80*ts* UAS-*Kir*, black data  
559 points  $\pm$  SEM) show cycling with peak expression around ZT0 in all subsets of neurons.  
560 Silencing the network causes the sLNvs to get arrhythmic (left panel). The LNds show no

561 reduction in cycling amplitude and only a slight shift in protein cycling (middle panel). The  
562 DN1s (right panel) show a reduction of PER cycling amplitude.

563

564 Supplement Figure 4 Stopping neuronal silencing after 6 days in DD does not re-establish  
565 rhythmic behavior. Actograms of individual flies recorded at 30 degrees for 3 days in LD 12:12  
566 (indicated by yellow boxes). Flies were then transferred into constant darkness at 30 degrees (red  
567 area). Flies show no sign of rhythm due to the silencing of the network. We lowered the  
568 temperature to 18 degrees (blue area) to stop neuronal silencing. None of the flies re-established  
569 rhythmic behavior.

570

571 Supplement Figure 5 Immunolabeling of cell-specific per KO using *Mai179*-GAL4. *Mai179*-  
572 GAL 4 is expressed in 3 out of 6 LNds, the sLNvs and shows weakly and variable expression in  
573 DN1 and ILNv neurons. We performed PER (green) and PDF (magenta) in *Mai179>Cas9 per-g*  
574 flies and found that 3 LNds were PER+, the sLNvs were PER- and one of the ILNvs was PER-.  
575 This nicely reproduces the expression pattern mentioned above. Asterix represents successful  
576 KO.

577

578 Supplement Figure 6 PER knockout in non-lateral neuron clusters does not affect rhythmicity  
579 levels. All investigated genotypes showed high levels of rhythmicity, suggesting that the LNds  
580 and sLNvs are the key players in determining rhythmicity.

581

582 **References**

- 583 Abruzzi KC, Zadina A, Luo W, Wiyanto E, Rahman R, Guo F, Shafer O, Rosbash M. 2017.  
584 RNA-seq analysis of *Drosophila* clock and non-clock neurons reveals neuron-specific  
585 cycling and novel candidate neuropeptides. *PLoS Genet* **13**:e1006613.
- 586 Allada R, White NE, So WV, Hall JC, Rosbash M. 1998. A mutant *Drosophila* homolog of  
587 mammalian Clock disrupts circadian rhythms and transcription of *period* and *timeless*. *Cell*  
588 **93**:791–804.
- 589 Benito J, Houl JH, Roman GW, Hardin PE. 2008. The blue-light photoreceptor  
590 CRYPTOCHROME is expressed in a subset of circadian oscillator neurons in the  
591 *Drosophila* CNS. *J Biol Rhythms* **23**:296–307.
- 592 Benito J, Zheng H, Hardin PE. 2007. PDP1 Functions Downstream of the Circadian Oscillator to  
593 Mediate Behavioral Rhythms. *Journal of Neuroscience*. doi:10.1523/jneurosci.4870-  
594 06.2007
- 595 Bulthuis N, Spontak KR, Kleeman B, Cavanaugh DJ. 2019. Neuronal Activity in Non-LNV  
596 Clock Cells Is Required to Produce Free-Running Rest:Activity Rhythms in *Drosophila*. *J*  
597 *Biol Rhythms* 748730419841468.
- 598 Depetris-Chauvin A, Berni J, Aranovich EJ, Muraro NI, Beckwith EJ, Ceriani MF. 2011. Adult-  
599 specific electrical silencing of pacemaker neurons uncouples molecular clock from  
600 circadian outputs. *Curr Biol* **21**:1783–1793.
- 601 Evans JA. 2016. Collective timekeeping among cells of the master circadian clock. *J Endocrinol*  
602 **230**:R27–49.
- 603 Fernández MP, Berni J, Ceriani MF. 2008. Circadian remodeling of neuronal circuits involved in  
604 rhythmic behavior. *PLoS Biol* **6**:e69.

- 605 Gekakis N. 1998. Role of the CLOCK Protein in the Mammalian Circadian Mechanism. *Science*.  
606 doi:10.1126/science.280.5369.1564
- 607 Grima B, Chélot E, Xia R, Rouyer F. 2004. Morning and evening peaks of activity rely on  
608 different clock neurons of the *Drosophila* brain. *Nature* **431**:869–873.
- 609 Gummadova JO, Coutts GA, Glossop NRJ. 2009. Analysis of the *Drosophila* Clock promoter  
610 reveals heterogeneity in expression between subgroups of central oscillator cells and  
611 identifies a novel enhancer region. *J Biol Rhythms* **24**:353–367.
- 612 Guo F, Cerullo I, Chen X, Rosbash M. 2014. PDF neuron firing phase-shifts key circadian  
613 activity neurons in *Drosophila*. *Elife* **3**. doi:10.7554/eLife.02780
- 614 Guo F, Chen X, Rosbash M. 2017. Temporal calcium profiling of specific circadian neurons in  
615 freely moving flies. *Proc Natl Acad Sci U S A* **114**:E8780–E8787.
- 616 Guo F, Holla M, Díaz MM, Rosbash M. 2018. A Circadian Output Circuit Controls Sleep-Wake  
617 Arousal in *Drosophila*. *Neuron* **100**:624–635.e4.
- 618 Guo F, Yu J, Jung HJ, Abruzzi KC, Luo W, Griffith LC, Rosbash M. 2016. Circadian neuron  
619 feedback controls the *Drosophila* sleep--activity profile. *Nature* **536**:292–297.
- 620 Hamada FN, Rosenzweig M, Kang K, Pulver SR, Ghezzi A, Jegla TJ, Garrity PA. 2008. An  
621 internal thermal sensor controlling temperature preference in *Drosophila*. *Nature* **454**:217–  
622 220.
- 623 Hardin PE. 2011. Molecular genetic analysis of circadian timekeeping in *Drosophila*. *Adv Genet*  
624 **74**:141–173.
- 625 Helfrich-Förster C. 1997. Development of pigment-dispersing hormone-immunoreactive neurons  
626 in the nervous system of *Drosophila melanogaster*. *J Comp Neurol* **380**:335–354.

- 627 Helfrich-Förster C, Yoshii T, Wülbeck C, Grieshaber E, Rieger D, Bachleitner W, Cusumano P,  
628 Rouyer F. 2007. The lateral and dorsal neurons of *Drosophila melanogaster*: new insights  
629 about their morphology and function. *Cold Spring Harb Symp Quant Biol* **72**:517–525.
- 630 Im SH, Li W, Taghert PH. 2011. PDFR and CRY Signaling Converge in a Subset of Clock  
631 Neurons to Modulate the Amplitude and Phase of Circadian Behavior in *Drosophila*. *PLoS*  
632 *ONE*. doi:10.1371/journal.pone.0018974
- 633 Ito C, Tomioka K. 2016. Heterogeneity of the Peripheral Circadian Systems in *Drosophila*  
634 *melanogaster*: A Review. *Front Physiol* **7**:8.
- 635 Johns DC, Marx R, Mains RE, O'Rourke B, Marbán E. 1999. Inducible genetic suppression of  
636 neuronal excitability. *J Neurosci* **19**:1691–1697.
- 637 Kistenpfennig C, Nakayama M, Nihara R, Tomioka K, Helfrich-Förster C, Yoshii T. 2018. A  
638 Tug-of-War between Cryptochrome and the Visual System Allows the Adaptation of  
639 Evening Activity to Long Photoperiods in *Drosophila melanogaster*. *J Biol Rhythms*  
640 **33**:24–34.
- 641 Konopka RJ, Benzer S. 1971. Clock mutants of *Drosophila melanogaster*. *Proc Natl Acad Sci U*  
642 *S A* **68**:2112–2116.
- 643 Lamaze A, Krättschmer P, Chen K-F, Lowe S, Jepson JEC. 2018. A Wake-Promoting Circadian  
644 Output Circuit in *Drosophila*. *Curr Biol* **28**:3098–3105.e3.
- 645 Liang X, Ho MCW, Zhang Y, Li Y, Wu MN, Holy TE, Taghert PH. 2019. Morning and Evening  
646 Circadian Pacemakers Independently Drive Premotor Centers via a Specific Dopamine  
647 Relay. *Neuron* **102**:843–857.e4.
- 648 Lin Y, Stormo GD, Taghert PH. 2004. The neuropeptide pigment-dispersing factor coordinates  
649 pacemaker interactions in the *Drosophila* circadian system. *J Neurosci* **24**:7951–7957.

- 650 Li Y, Guo F, Shen J, Rosbash M. 2014. PDF and cAMP enhance PER stability in *Drosophila*  
651 clock neurons. *Proc Natl Acad Sci U S A* **111**:E1284–90.
- 652 Long X, Colonell J, Wong AM, Singer RH, Lionnet T. 2017. Quantitative mRNA imaging  
653 throughout the entire *Drosophila* brain. *Nature Methods*. doi:10.1038/nmeth.4309
- 654 McGuire SE, Le PT, Osborn AJ, Matsumoto K, Davis RL. 2003. Spatiotemporal rescue of  
655 memory dysfunction in *Drosophila*. *Science* **302**:1765–1768.
- 656 Menegazzi P, Vanin S, Yoshii T, Rieger D, Hermann C, Dusik V, Kyriacou CP, Helfrich-Förster  
657 C, Costa R. 2013. *Drosophila* clock neurons under natural conditions. *J Biol Rhythms*  
658 **28**:3–14.
- 659 Mohawk JA, Green CB, Takahashi JS. 2012. Central and peripheral circadian clocks in  
660 mammals. *Annu Rev Neurosci* **35**:445–462.
- 661 Ni JD, Gurav AS, Liu W, Ogunmowo TH, Hackbart H, Elsheikh A, Verdegaal AA, Montell C.  
662 2019. Differential regulation of the sleep homeostat by circadian and arousal inputs. *Elife*  
663 **8**. doi:10.7554/eLife.40487
- 664 Nitabach MN, Blau J, Holmes TC. 2002. Electrical silencing of *Drosophila* pacemaker neurons  
665 stops the free-running circadian clock. *Cell* **109**:485–495.
- 666 Port F, Bullock SL. 2016. Augmenting CRISPR applications in *Drosophila* with tRNA-flanked  
667 sgRNAs. *Nat Methods* **13**:852–854.
- 668 Reischig T, Stengl M. 2003. Ultrastructure of pigment-dispersing hormone-immunoreactive  
669 neurons in a three-dimensional model of the accessory medulla of the cockroach  
670 *Leucophaea maderae*. *Cell Tissue Res* **314**:421–435.

- 671 Renn SC, Park JH, Rosbash M, Hall JC, Taghert PH. 1999. A *pdf* neuropeptide gene mutation  
672 and ablation of PDF neurons each cause severe abnormalities of behavioral circadian  
673 rhythms in *Drosophila*. *Cell* **99**:791–802.
- 674 Rieger D, Stanewsky R, Helfrich-Förster C. 2003. Cryptochrome, compound eyes, Hofbauer-  
675 Buchner eyelets, and ocelli play different roles in the entrainment and masking pathway of  
676 the locomotor activity rhythm in the fruit fly *Drosophila melanogaster*. *J Biol Rhythms*  
677 **18**:377–391.
- 678 Schlichting M, Helfrich-Förster C. 2015. Photic Entrainment in *Drosophila* Assessed by  
679 Locomotor Activity Recordings. *Methods in Enzymology*. doi:10.1016/bs.mie.2014.10.017
- 680 Schlichting M, Menegazzi P, Rosbash M, Helfrich-Förster C. 2019. A distinct visual pathway  
681 mediates high light intensity adaptation of the circadian clock in *Drosophila*. *The Journal*  
682 *of Neuroscience*. doi:10.1523/jneurosci.1497-18.2018
- 683 Schlichting M, Weidner P, Diaz M, Menegazzi P, Dalla-Benetta E, Helfrich-Foerster C, Rosbash  
684 M. n.d. Light-mediated circuit switching in the *Drosophila* neuronal clock network.  
685 doi:10.1101/515478
- 686 Schmid B, Helfrich-Förster C, Yoshii T. 2011. A new ImageJ plug-in “ActogramJ” for  
687 chronobiological analyses. *J Biol Rhythms* **26**:464–467.
- 688 Shafer OT, Taghert PH. 2009. RNA-interference knockdown of *Drosophila* pigment dispersing  
689 factor in neuronal subsets: the anatomical basis of a neuropeptide’s circadian functions.  
690 *PLoS One* **4**:e8298.
- 691 Shang Y, Griffith LC, Rosbash M. 2008. Light-arousal and circadian photoreception circuits  
692 intersect at the large PDF cells of the *Drosophila* brain. *Proc Natl Acad Sci U S A*  
693 **105**:19587–19594.

- 694 Sheeba V, Fogle KJ, Kaneko M, Rashid S, Chou Y-T, Sharma VK, Holmes TC. 2008. Large  
695 ventral lateral neurons modulate arousal and sleep in *Drosophila*. *Curr Biol* **18**:1537–1545.
- 696 Shigeyoshi Y, Taguchi K, Yamamoto S, Takekida S, Yan L, Tei H, Moriya T, Shibata S, Loros  
697 JJ, Dunlap JC, Okamura H. 1997. Light-induced resetting of a mammalian circadian clock  
698 is associated with rapid induction of the *mPer1* transcript. *Cell* **91**:1043–1053.
- 699 Stanewsky R, Kaneko M, Emery P, Beretta B, Wager-Smith K, Kay SA, Rosbash M, Hall JC.  
700 1998. The *cryb* mutation identifies cryptochrome as a circadian photoreceptor in  
701 *Drosophila*. *Cell* **95**:681–692.
- 702 Stoleru D, Peng Y, Agosto J, Rosbash M. 2004. Coupled oscillators control morning and evening  
703 locomotor behaviour of *Drosophila*. *Nature* **431**:862–868.
- 704 Stoleru D, Peng Y, Nawathean P, Rosbash M. 2005. A resetting signal between *Drosophila*  
705 pacemakers synchronizes morning and evening activity. *Nature* **438**:238–242.
- 706 Webb AB, Taylor SR, Thoroughman KA, Doyle FJ, Herzog ED. 2012. Weakly Circadian Cells  
707 Improve Resynchrony. *PLoS Computational Biology*. doi:10.1371/journal.pcbi.1002787
- 708 Welsh DK, Logothetis DE, Meister M, Reppert SM. 1995. Individual neurons dissociated from  
709 rat suprachiasmatic nucleus express independently phased circadian firing rhythms.  
710 *Neuron*. doi:10.1016/0896-6273(95)90214-7
- 711 Wu Y, Cao G, Nitabach MN. 2008. Electrical silencing of PDF neurons advances the phase of  
712 non-PDF clock neurons in *Drosophila*. *J Biol Rhythms* **23**:117–128.
- 713 Yamaguchi S, Isejima H, Matsuo T, Okura R, Yagita K, Kobayashi M, Okamura H. 2003.  
714 Synchronization of Cellular Clocks in the Suprachiasmatic Nucleus. *Science*.  
715 doi:10.1126/science.1089287



- 716 Yao Z, Bennett AJ, Clem JL, Shafer OT. 2016. The *Drosophila* Clock Neuron Network Features  
717 Diverse Coupling Modes and Requires Network-wide Coherence for Robust Circadian  
718 Rhythms. *Cell Rep* **17**:2873–2881.
- 719 Yao Z, Shafer OT. 2014. The *Drosophila* circadian clock is a variably coupled network of  
720 multiple peptidergic units. *Science* **343**:1516–1520.
- 721 Yoshii T, Todo T, Wülbeck C, Stanewsky R, Helfrich-Förster C. 2008. Cryptochrome is present  
722 in the compound eyes and a subset of *Drosophila*'s clock neurons. *J Comp Neurol*  
723 **508**:952–966.
- 724 Zhang L, Chung BY, Lear BC, Kilman VL, Liu Y, Mahesh G, Meissner R-A, Hardin PE, Allada  
725 R. 2010. DN1(p) circadian neurons coordinate acute light and PDF inputs to produce robust  
726 daily behavior in *Drosophila*. *Curr Biol* **20**:591–599.

Figure 1

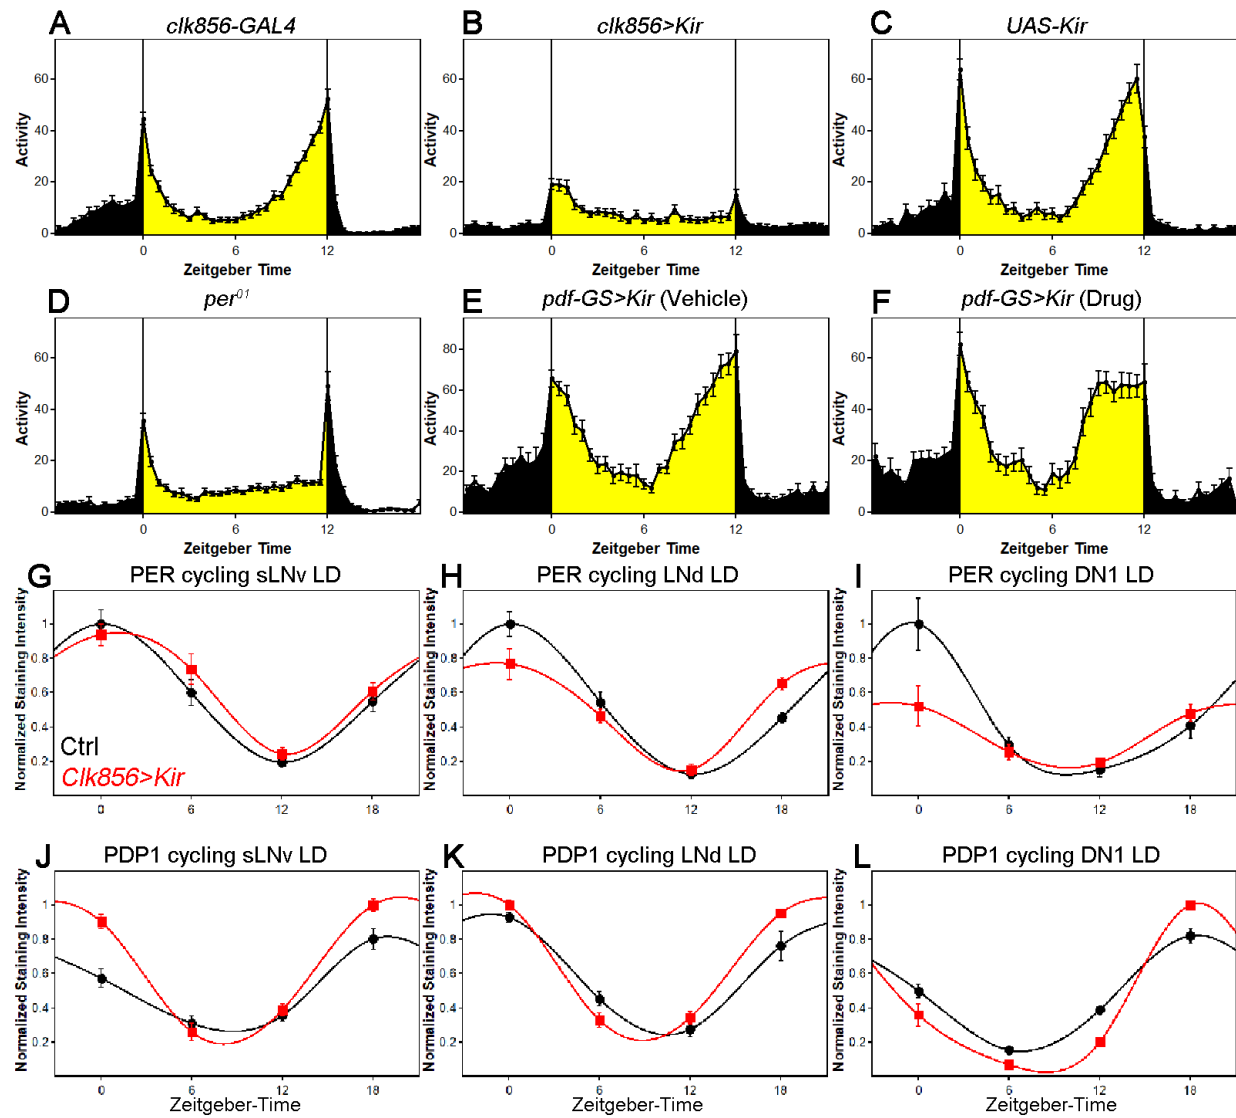

Figure 2

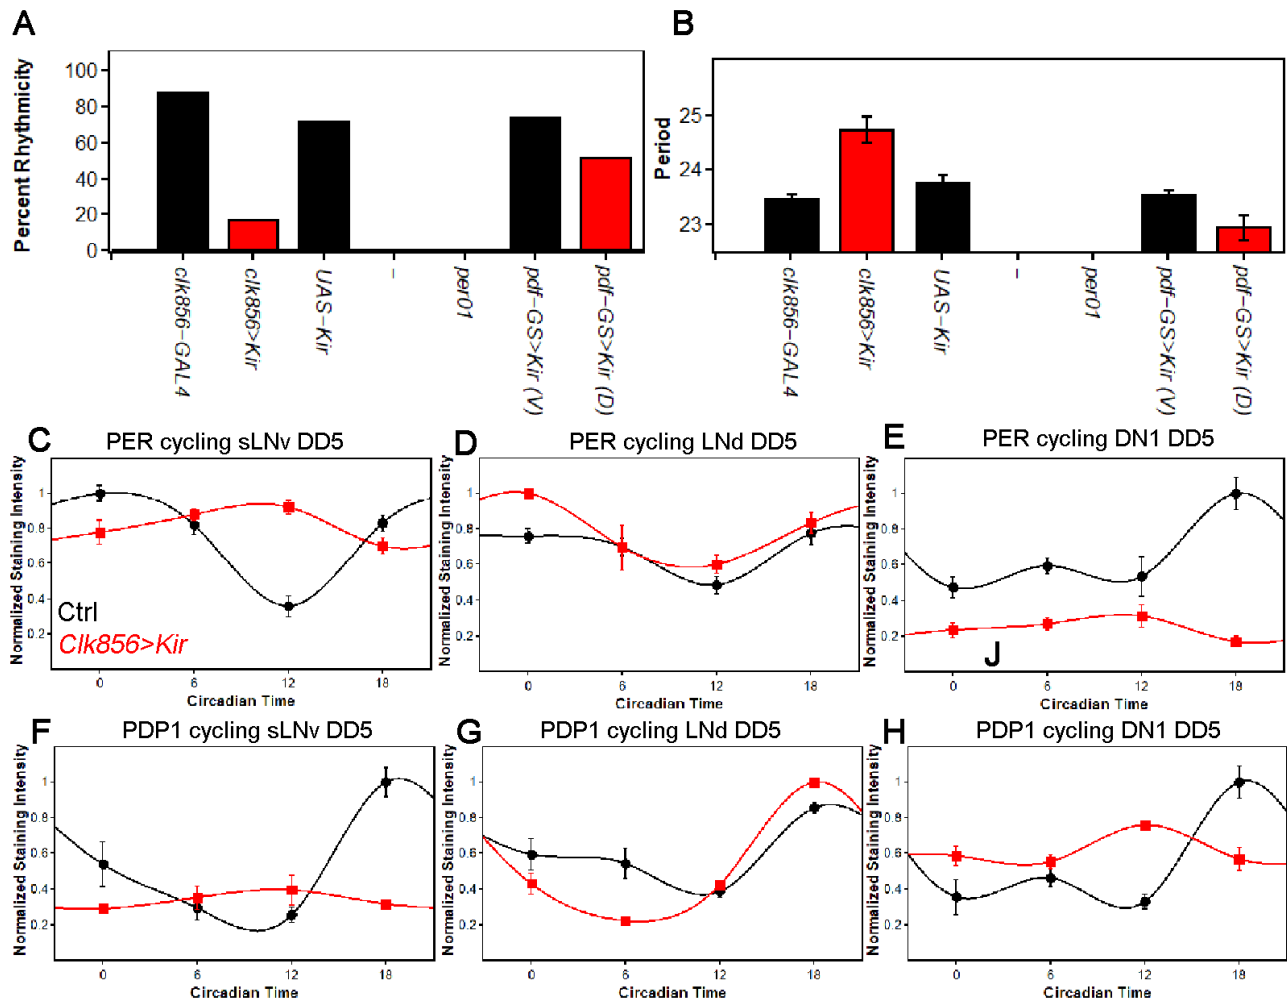

Figure 3

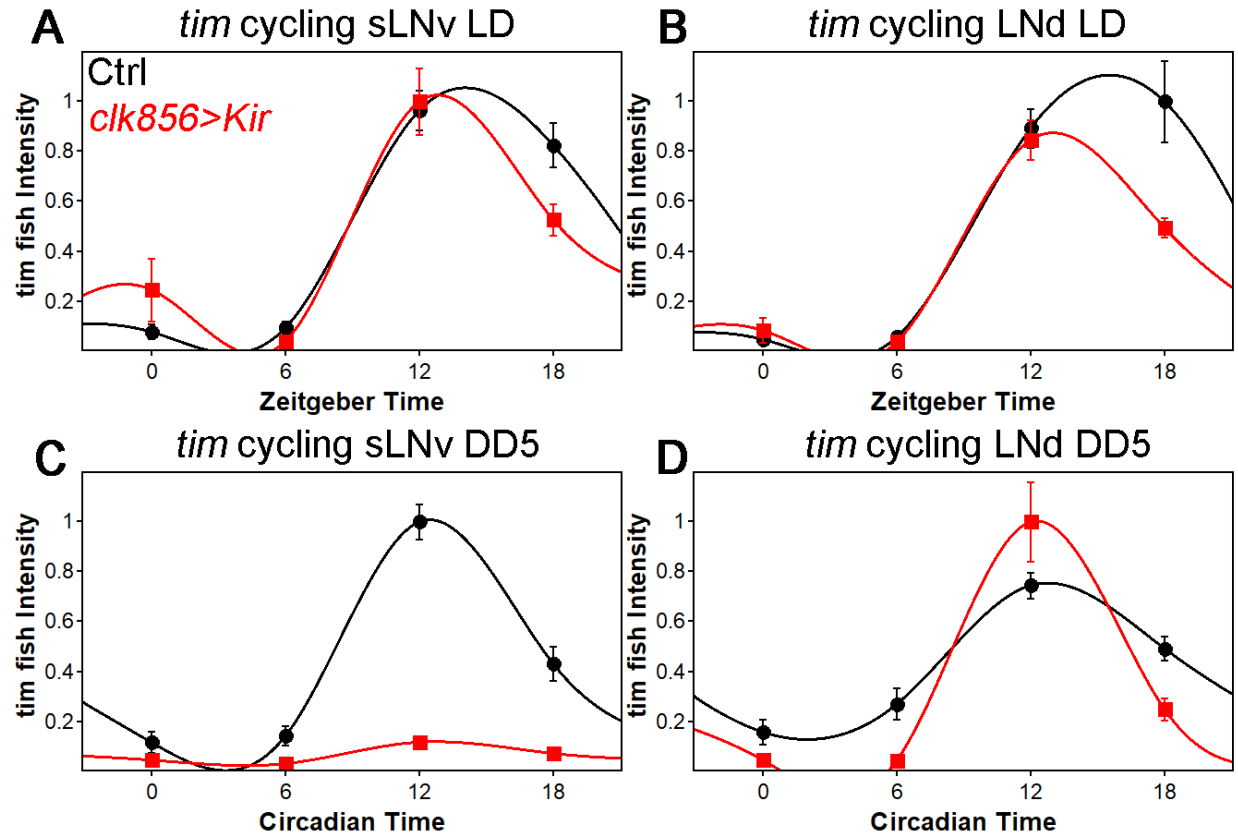

Figure 4

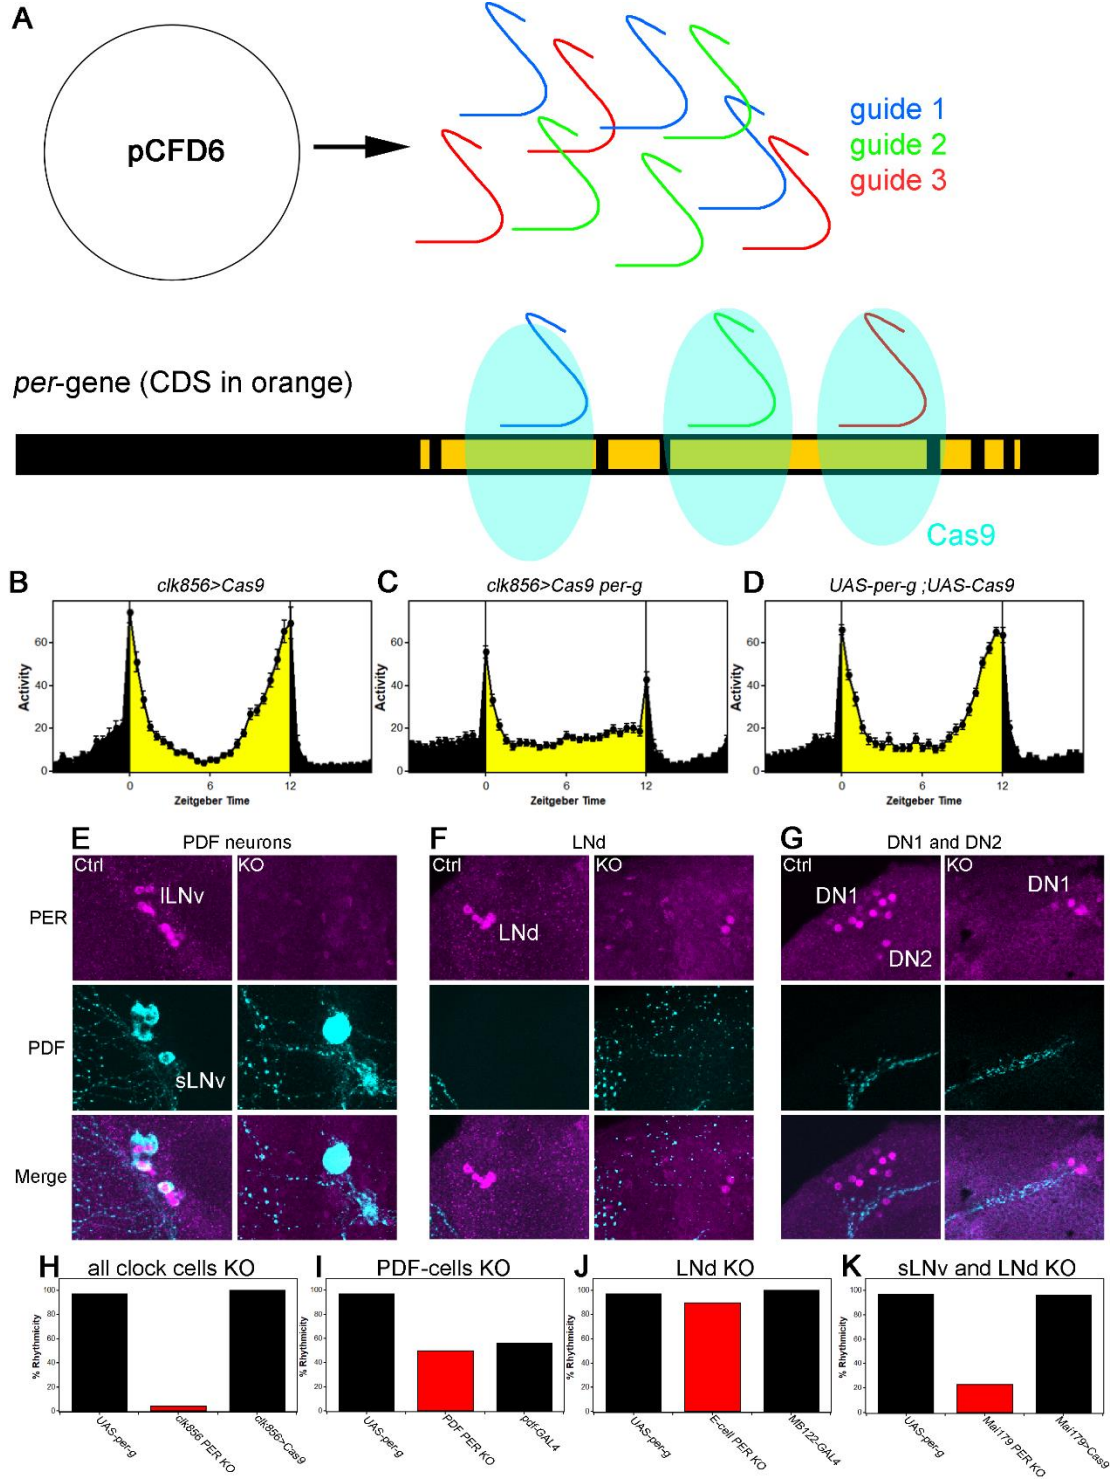

Figure 5

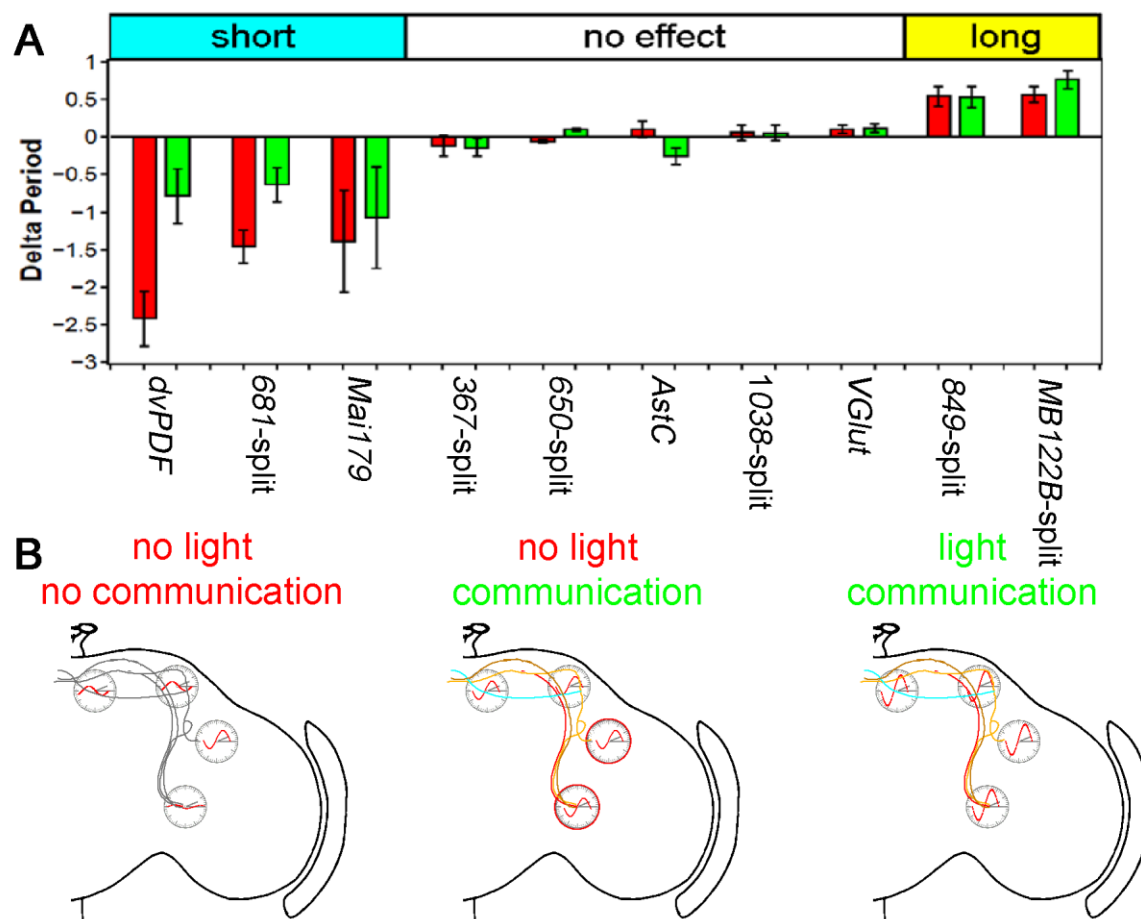

Supplement Figure 1

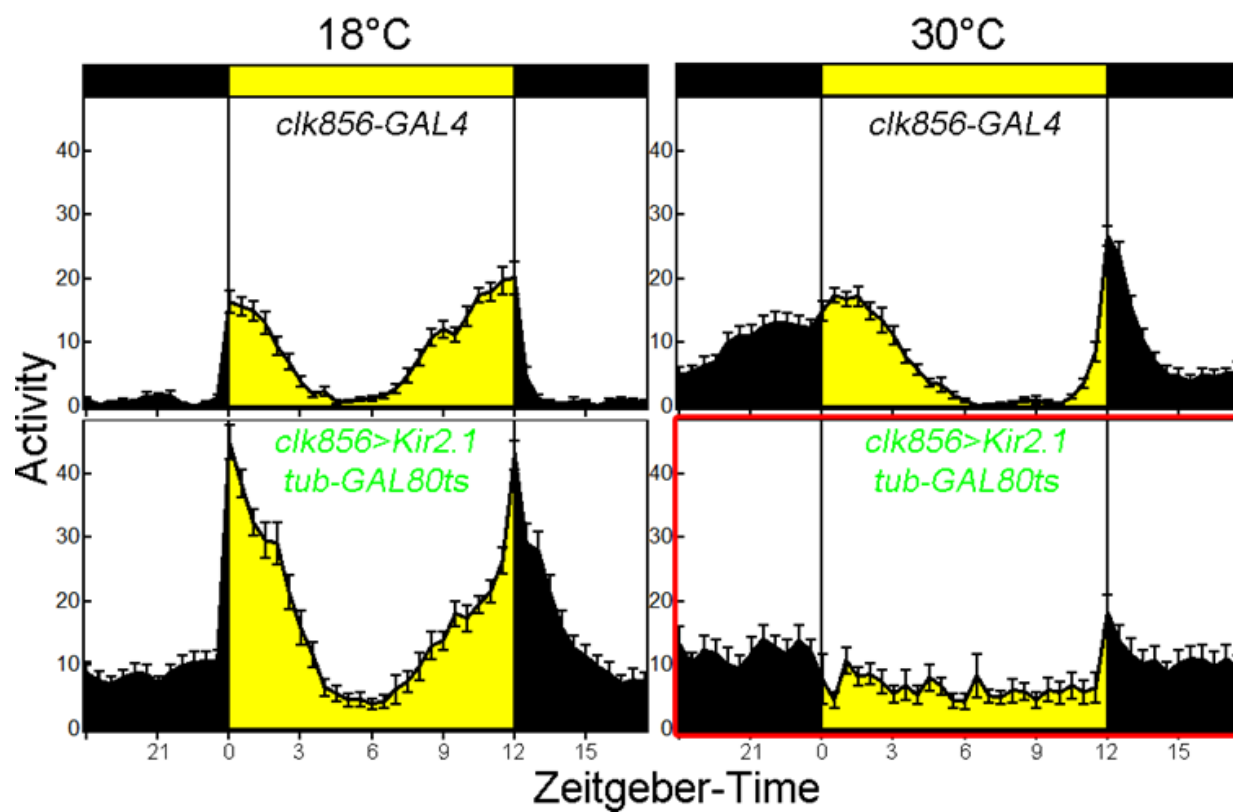

## Supplement Figure 2

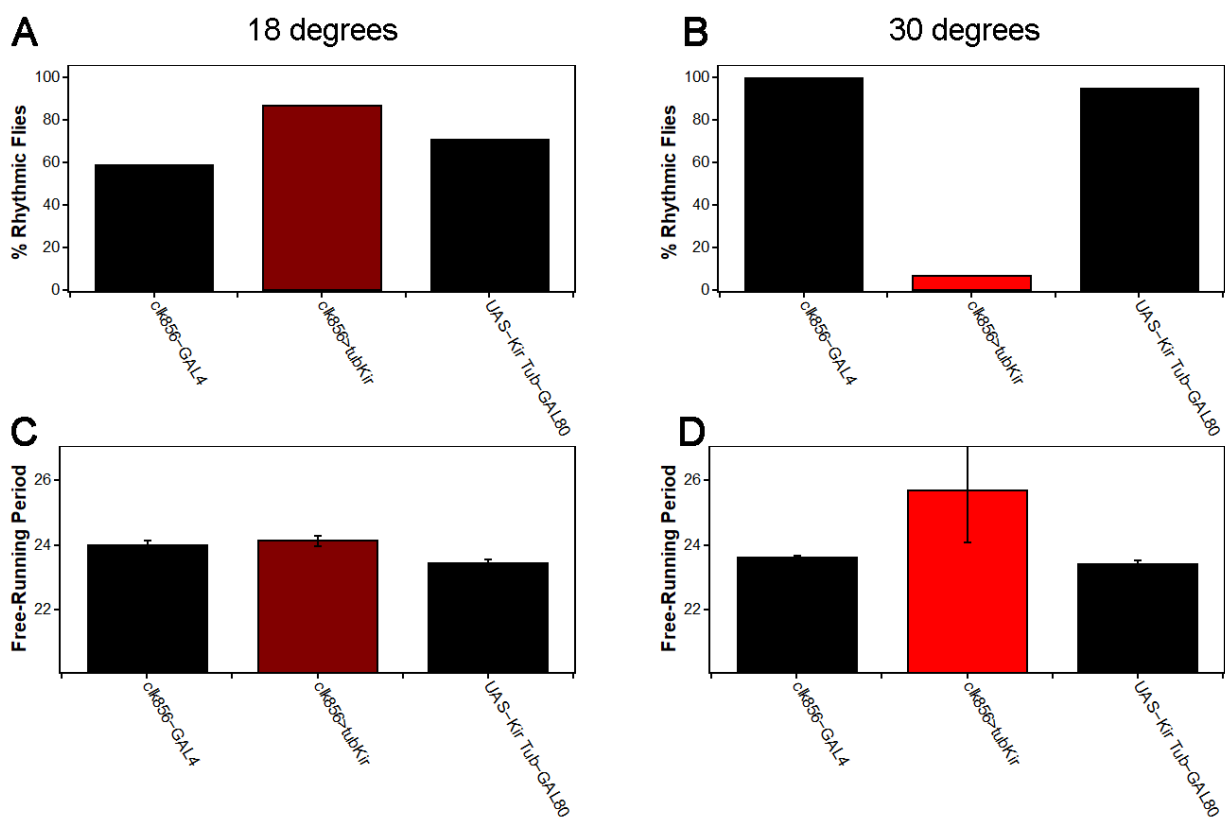



### Supplement Figure 3

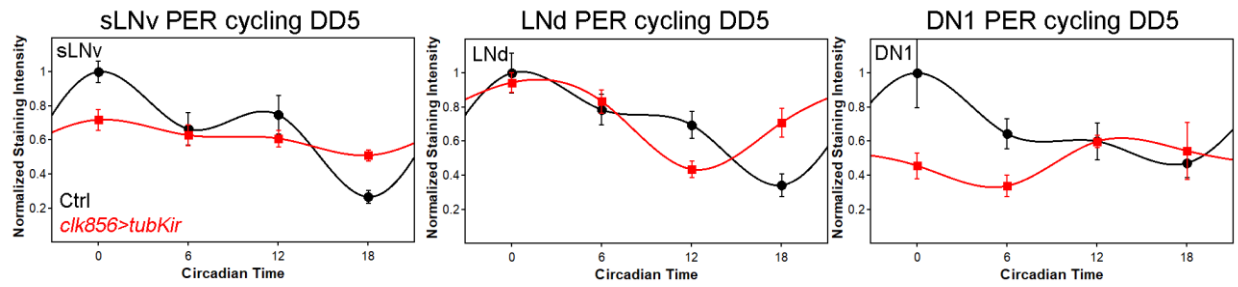

### Supplement Figure 4

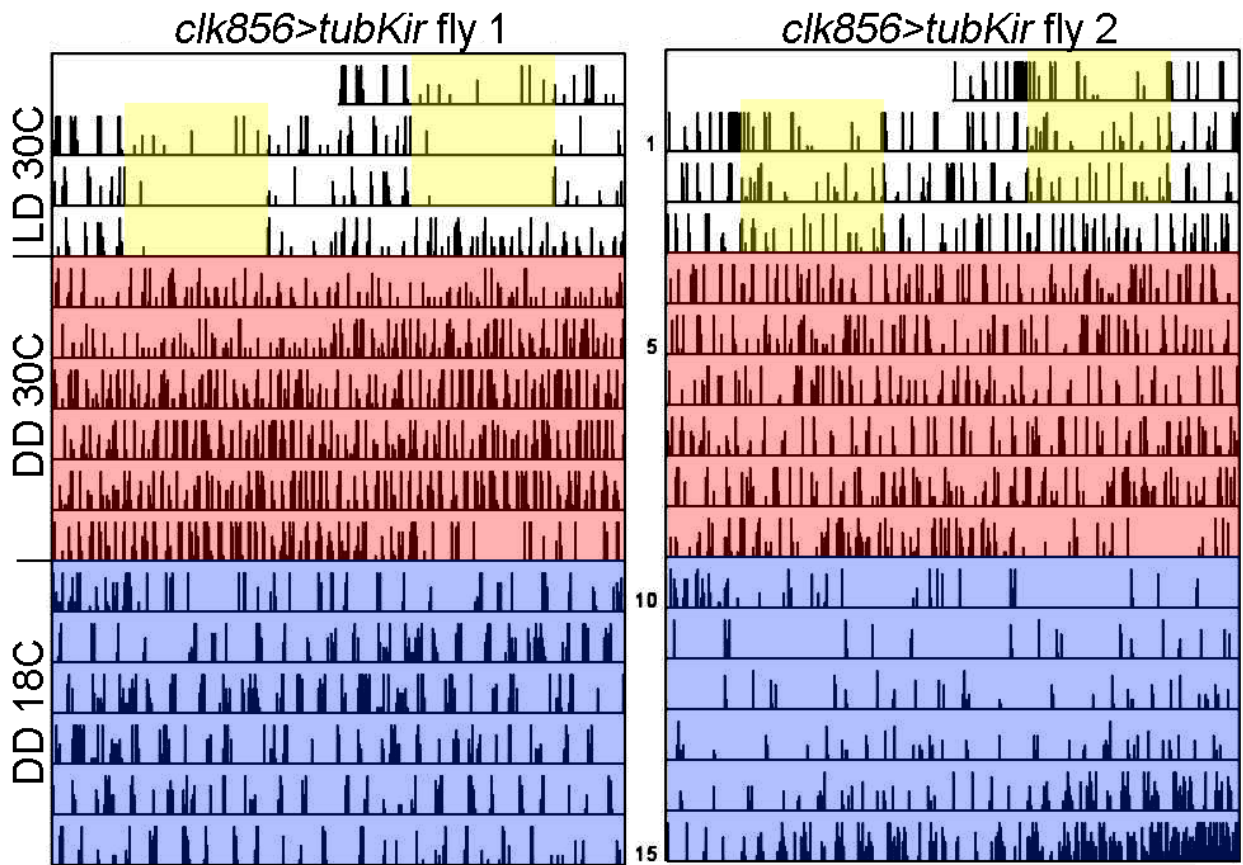

Supplement Figure 5

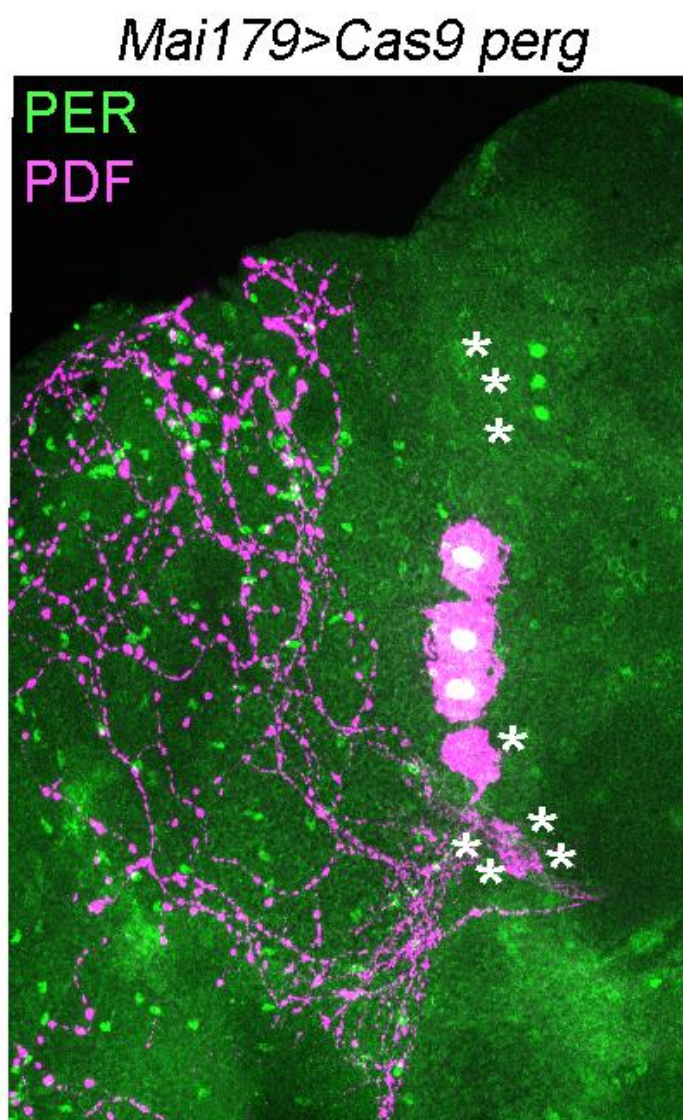

Supplement Figure 6

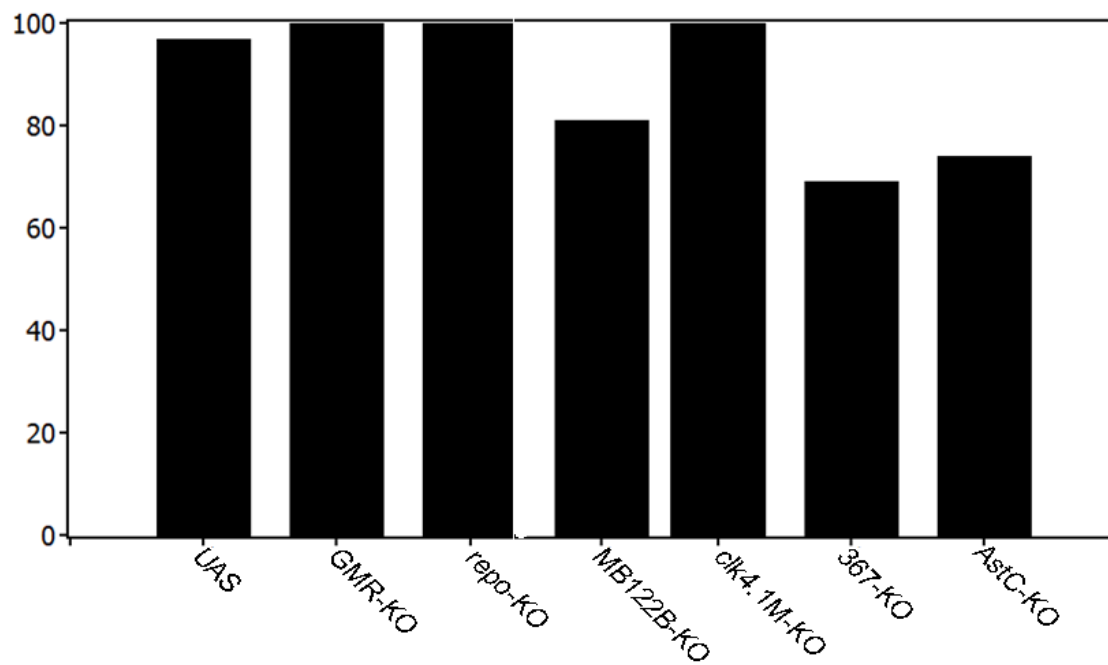

Source: http://biorxiv.org/content/10.1101/639146v2.full.pdf
